# Supplementary material for: Determination of Cyclaniliprole in Fruits and Vegetables Using Disposable Pipette Extraction Cleanup and Ultrahigh-Performance Liquid Chromatography-Tandem Mass Spectrometry
Source: MDPI journal article supplement (doi:10.3390/molecules27196464), 2022-09-30
Supplement: s1 [file s1]

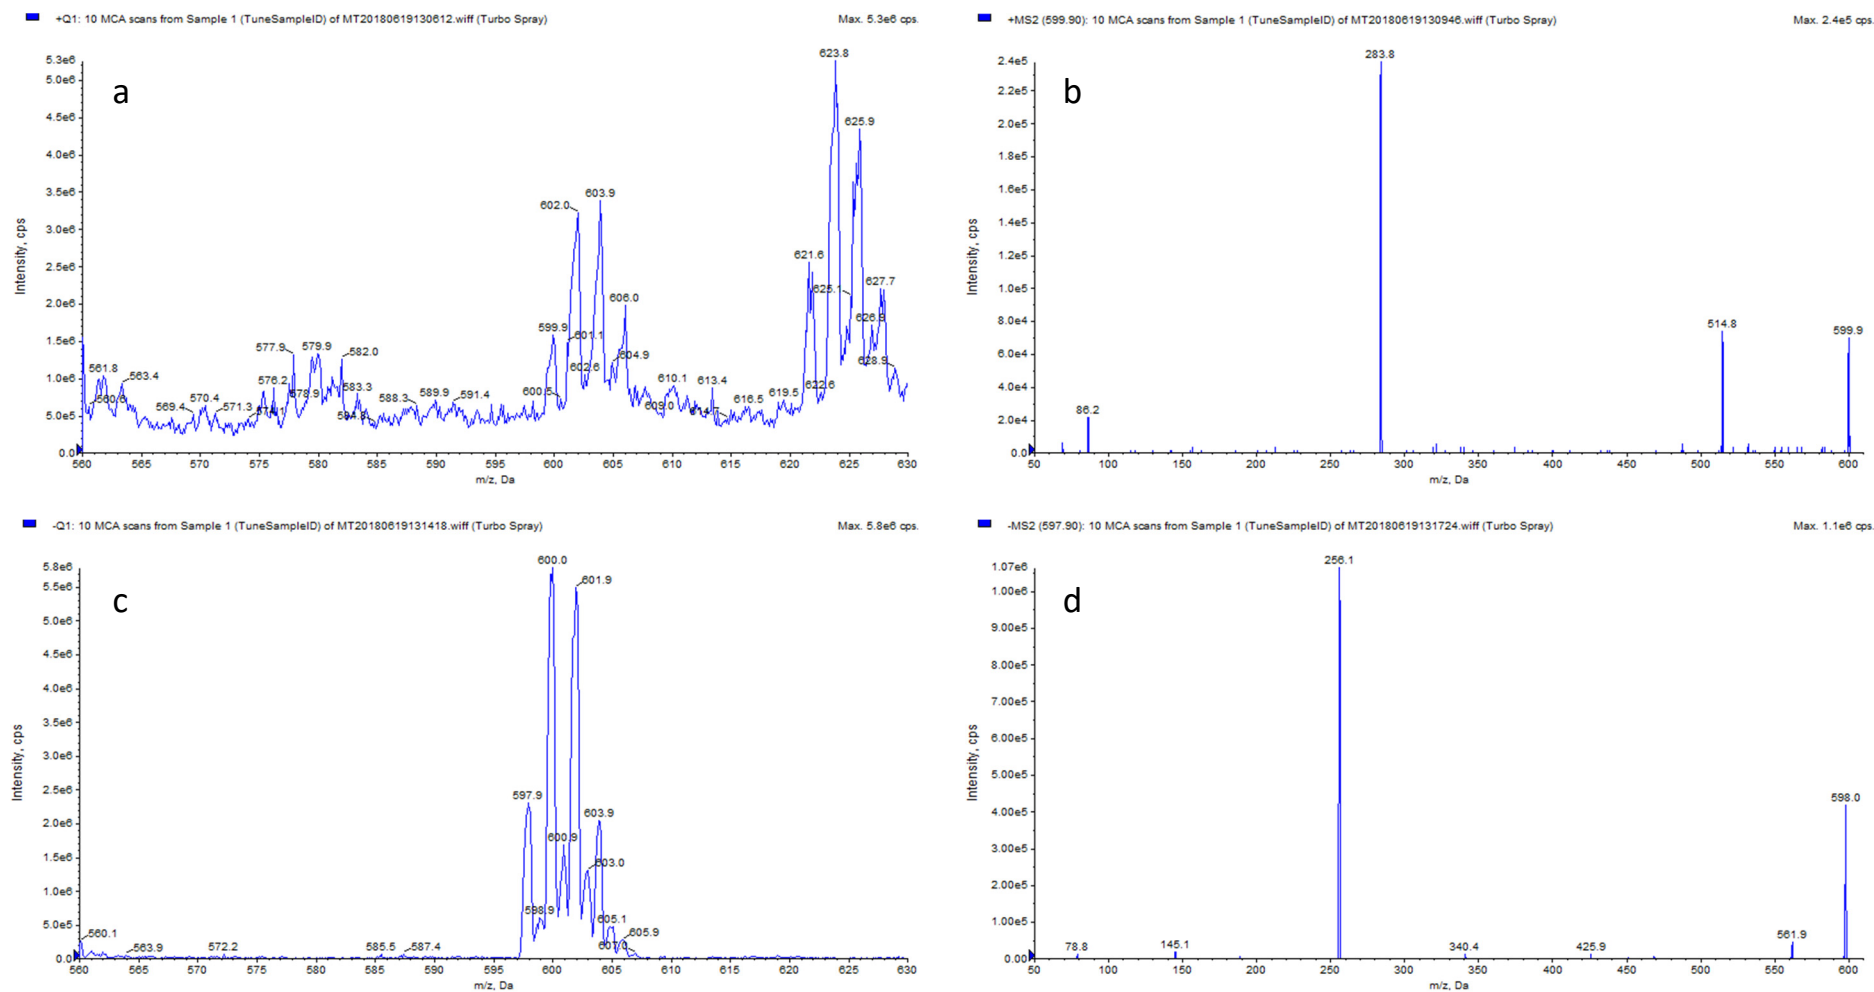

**Figure S1.** Spectrum of CYCP using Q1 ESI+ scan (mass range 560-630 Da) (a). Spectrum of product ions of selected CYCP parent ion at 599.9

Da using ESI<sup>+</sup> product ion mode (mass range 50-610 Da) (b). Spectrum of CYCP using Q1 ESI<sup>-</sup> scan (mass range 560-630 Da) (c). Spectrum of product ions of selected CYCP parent ion at 599.9 Da using ESI<sup>-</sup> product ion mode (mass range 50-610 Da) (d).
